# Supplementary material for: Applicability of Mechanical Tests for Biomass Pellet Characterisation for Bioenergy Applications
Source: MDPI journal article supplement (doi:10.3390/ma11081329), 2018-07-31
Supplement: s1 [file s1]

# Supplemental Data: Applicability of Mechanical Tests for Biomass Pellet Characterisation for Bioenergy Applications

Orla Williams \*, Simon Taylor, Edward Lester, Sam Kingman, Donald Giddings and Carol Eastwick

Faculty of Engineering, the University of Nottingham, University Park, Nottingham NG7 2RD, UK; taylor\_simon@hotmail.co.uk (S.T.); edward.lester@nottingham.ac.uk (E.L.); sam.kingman@nottingham.ac.uk (S.K.); donald.giddings@nottingham.ac.uk (D.G.); carol.eastwick@nottingham.ac.uk (C.E.)

\* Correspondence: orla.williams@nottingham.ac.uk; Tel.: +44-1159515900

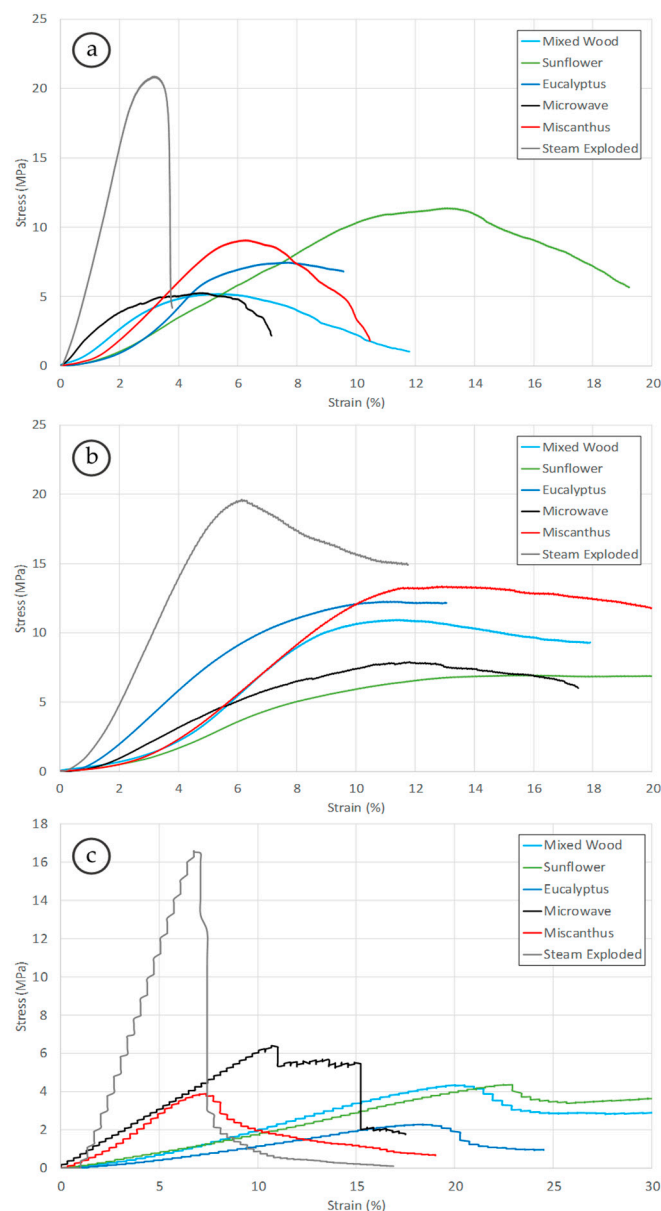

**Figure S1.** Typical quasi-static stress strain curves for biomass pellets in axial (a), diametric (b), and flexure (c) orientations.

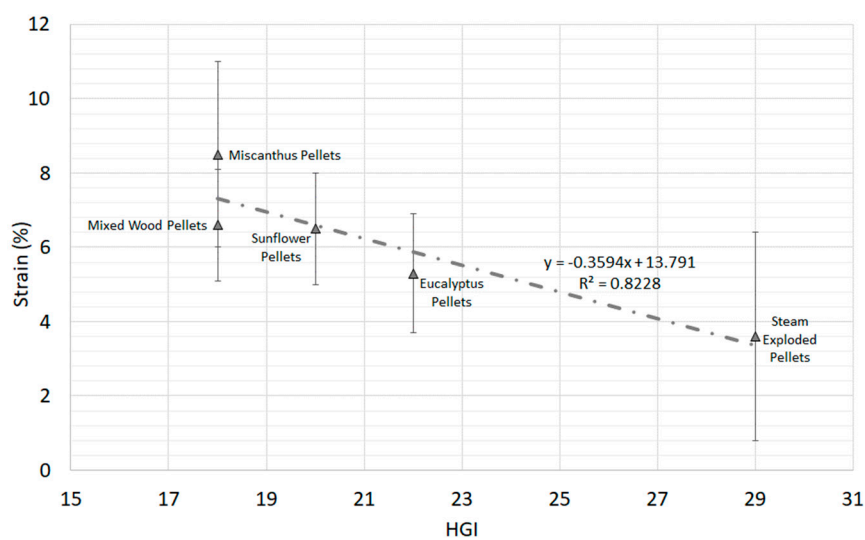

**Figure S2.** Biomass pellet quasi-static diametric elastic strain versus HGI (HGI  $n=2$ , strain data  $n=10$ ).

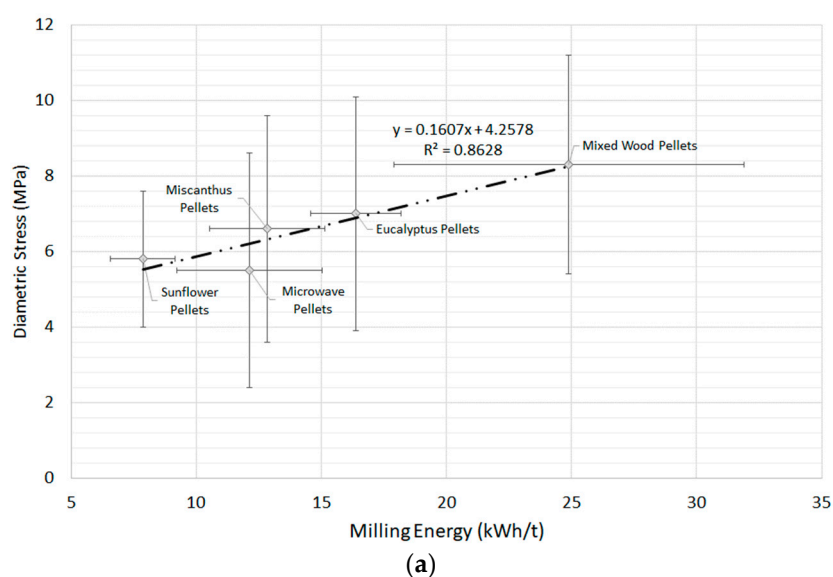

(a)

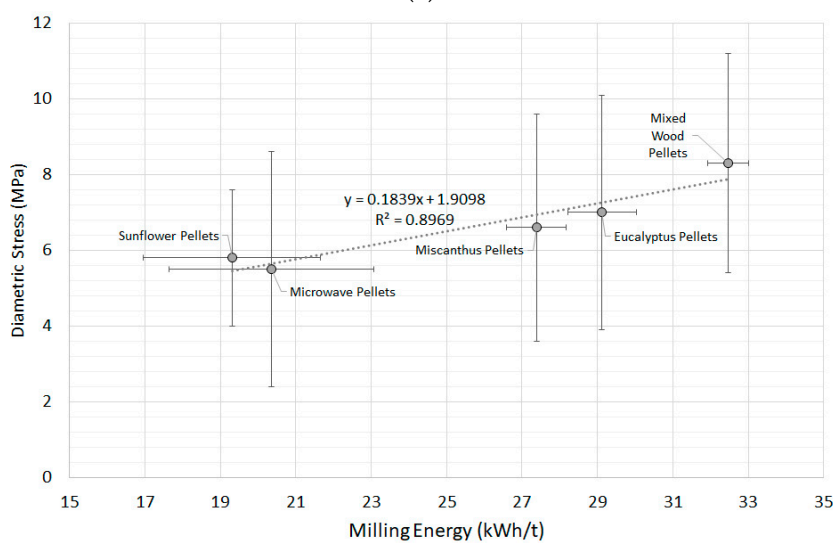

(b)

**Figure S3.** Ring-Roller (a) and knife mill (b) energy against biomass pellet quasi-static diametric proportional stress (milling energy N=3, stress data N=10).

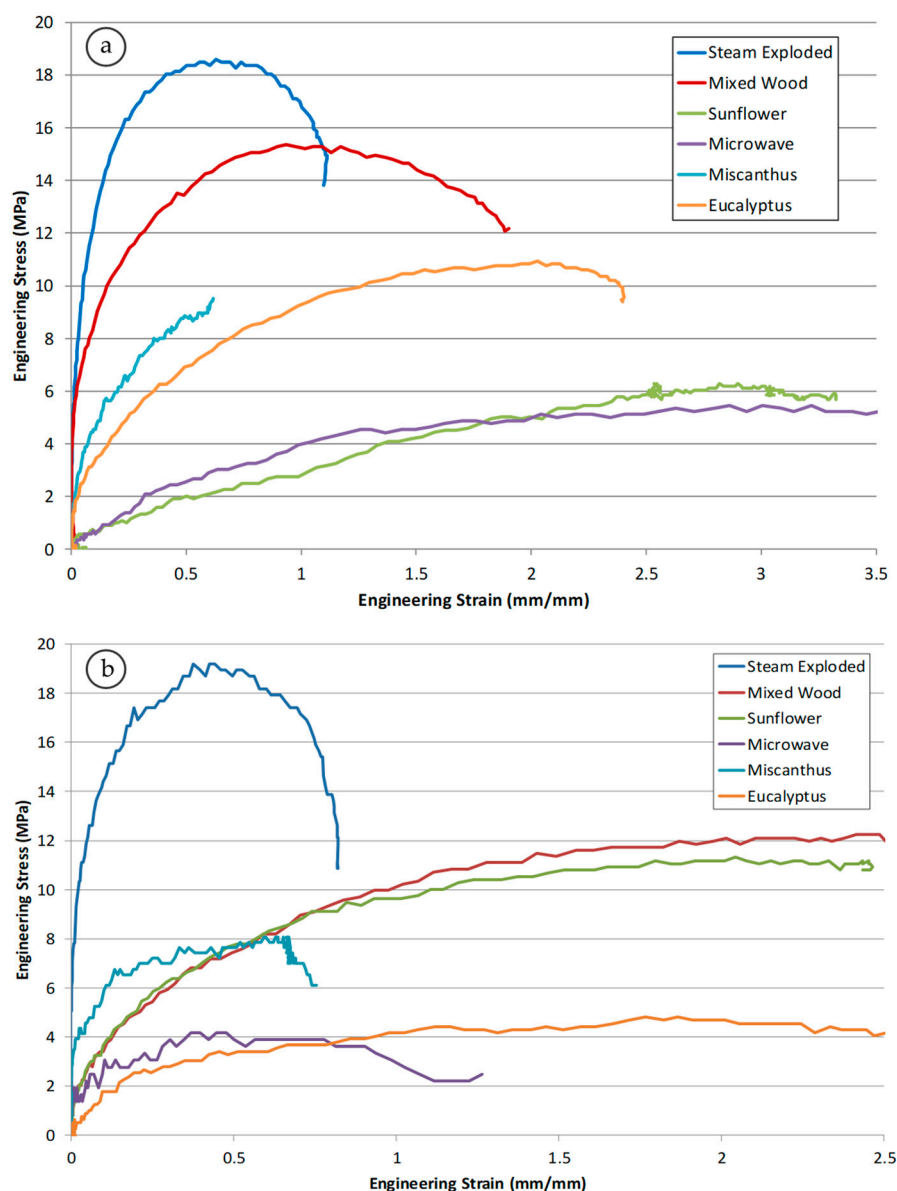

**Figure S4.** Typical dynamic stress strain curves for biomass pellets in axial (a) and, diametric (b), orientations.

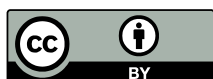

© 2018 by the authors. Submitted for possible open access publication under the terms and conditions of the Creative Commons Attribution (CC BY) license (<http://creativecommons.org/licenses/by/4.0/>).
